# Supplementary material
Source: PubMed Central journal article supplement (PMC6142995)
Supplement: jamaotolaryngolheadnecksurg-144-686-s001.pdf [file jamaotolaryngolheadnecksurg-144-686-s001.pdf]

## Supplementary Online Content

Kim JH, Fisher LM, Reder L, Hapner ER, Pepper J-P. Speech and communicative participation in patients with facial paralysis. *JAMA Otolaryngol Head Neck Surg*. Published online June 28, 2018.

doi:10.1001/jamaoto.2018.0649

**eTable 1.** Effect Size for Each Factor Entered in the FaCE Subscale MANOVA

**eTable 2.** Confidence Intervals (95%) for the FaCE by Subscale for Prior Treatment Effect

**eTable 3.** Effect Sizes and 95% CIs for the FaCE by Subscale for Effect of Etiology (Bell's Palsy, Tumor, Other)

This supplementary material has been provided by the authors to give readers additional information about their work.

**eTable 1.** Effect Size for Each Factor Entered in the FaCE Subscale MANOVA

| <b>Main Effect</b>         | <b>Partial <math>\eta^2</math></b> |
|----------------------------|------------------------------------|
| Age                        | .051                               |
| Prior Treatments (yes, no) | .122                               |
| Duration of Symptoms       | .061                               |
| Etiology                   | .125                               |

**eTable 2.** Confidence Intervals (95%) for the FaCE by Subscale for Prior Treatment Effect

| <b>Subscale</b> | <b>No-Prior-Treatment Relative to Had-Prior-Treatment</b> |
|-----------------|-----------------------------------------------------------|
| Movement        | -4.5 - 14.2                                               |
| Facial Comfort  | -18 - 5.0                                                 |
| Oral            | <b>1.9 – 26.8</b>                                         |
| Eye Comfort     | <b>4.5 – 28.8</b>                                         |
| Lacrimal        | -12 – 17.8                                                |
| Social Function | <b>4.1 – 24.6</b>                                         |

Bold indicates 95% CI that does not include -0-.

**eTable 3.** Effect Sizes and 95% CIs for the FaCE by Subscale for Effect of Etiology (Bell's Palsy, Tumor, Other)

| <b>Subscale</b> | <b>Partial <math>\eta^2</math></b> | <b>Etiology 95% CI</b>               |
|-----------------|------------------------------------|--------------------------------------|
| Movement        | .043                               | Bell's relative to Tumor: .85 – 21.2 |
| Facial Comfort  | .068                               | Bell's relative to Tumor: 2.9 – 28.3 |
| Oral            | .071                               | Bell's relative to Other: 4.1 – 31.8 |
|                 |                                    | Tumor relative to Other: 3.7 – 36.0  |
| Eye Comfort     | .060                               | Bell's relative to Tumor: 1.7 – 28.0 |
|                 |                                    | Tumor relative to Other: 2.7 – 34.3  |
| Lacrimal        | .034                               |                                      |
| Social Function | .021                               |                                      |

Only confidence intervals not including -0- shown.
